# Supplementary material for: Development of a modular photoreactor for the upscaling of continuous flow photochemistry
Source: Royal Society of Chemistry journal article supplement (doi:10.1039/d2re00310d), 2022-01-01

# Construction Manual OctoColor

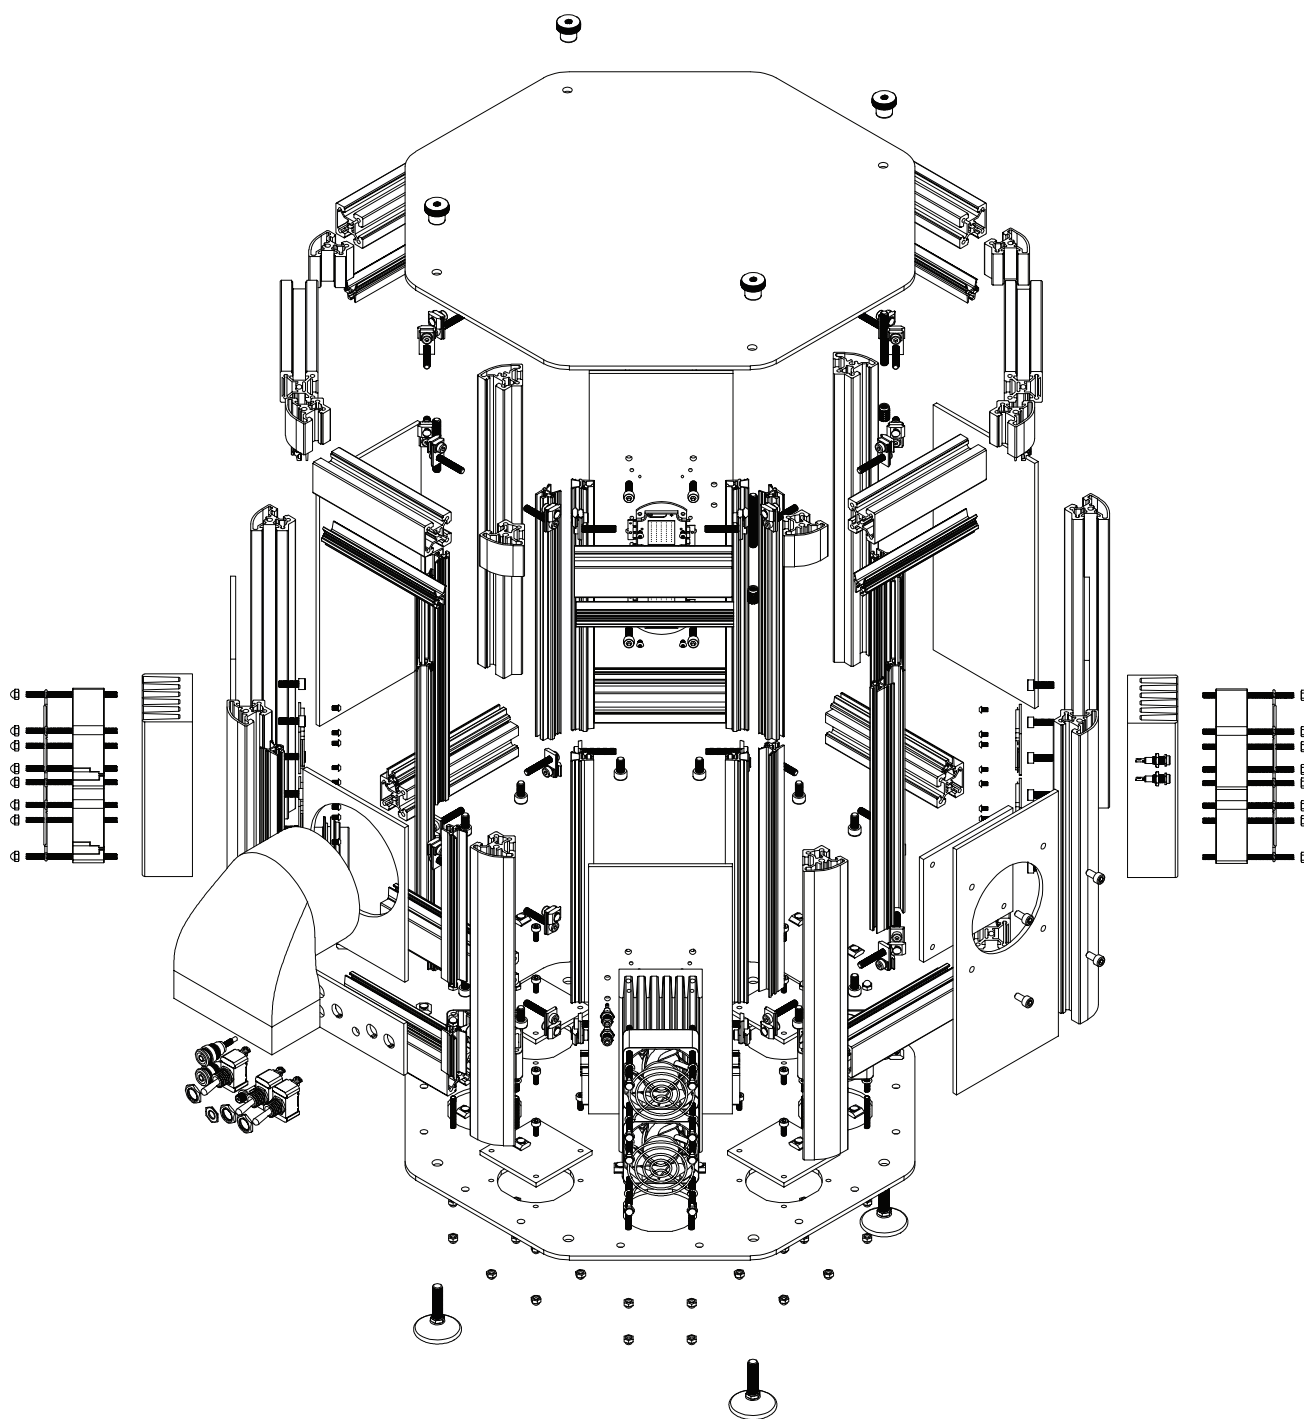

# Parts

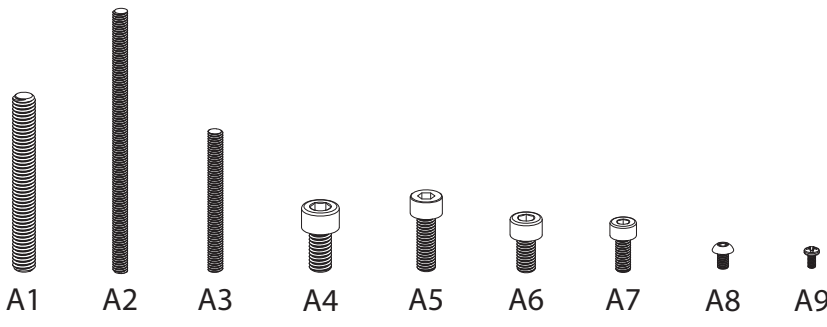

| #  | Description          |     |
|----|----------------------|-----|
| A1 | M6 x 50 mm rod       | x4  |
| A2 | M4 x 70 mm rod       | x32 |
| A3 | M4 x 50 mm rod       | x16 |
| A4 | M6 x 12 mm hex screw | x16 |
| A5 | M5 x 16 mm hex screw | x24 |
| A6 | M5 x 10 mm hex screw | x4  |
| A7 | M4 x 10 mm hex screw | x16 |
| A8 | M3 x 5 mm hex screw  | x32 |
| A9 | M2 x 4 mm screw      | x16 |

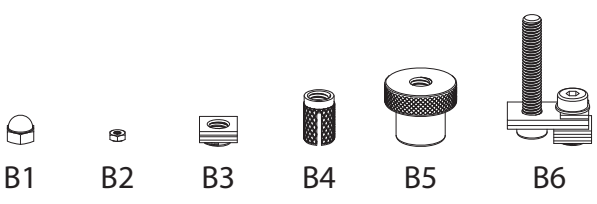

| #  | Description                           |     |
|----|---------------------------------------|-----|
| B1 | M4 Acorn nut                          | x80 |
| B2 | M2 nut                                | x16 |
| B3 | BLOCAN® T-Slot M6 - 4006712           | x16 |
| B4 | Brass insert nut M6                   | x4  |
| B5 | Knob M6                               | x4  |
| B6 | BLOCAN® Bracket Short 30x30 - 4106702 | x34 |

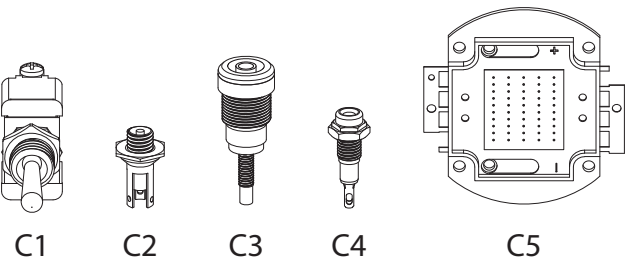

| #   | Description                                           |     |
|-----|-------------------------------------------------------|-----|
| C1  | SCI R13-29A-01A-HWH Toggleswitch 250 V/AC 10 A        | x3  |
| C2  | BKL Electronic 072335 DC-connector Bus                | x1  |
| C3  | Stäubli SLB4-G, female Bus (1x Red and 1x Black)      |     |
| C4  | SKS Hirschmann MBI 1, Ø: 2 mm ( 4x Red and 4x Black)  |     |
| C5  | HotRed Official Store 50W Led Light (AliExpress)      | x8  |
| C6  | Reely Bus XT60                                        | x20 |
| C7  | Reely Plug XT60                                       | x20 |
| C8  | Reely Bus XT30                                        | x20 |
| C9  | Reely Plug XT30                                       | x20 |
| C10 | TE Connectivity 34140 Ring Terminals                  | x40 |
| C11 | Stäubli SLS205-L plug, Ø: 2 mm ( 4x Red and 4x Black) |     |
| C12 | Copper Wire 16 AWG (Red and Black)                    |     |
| C13 | Copper Wire 22 AWG (Red and Black)                    |     |

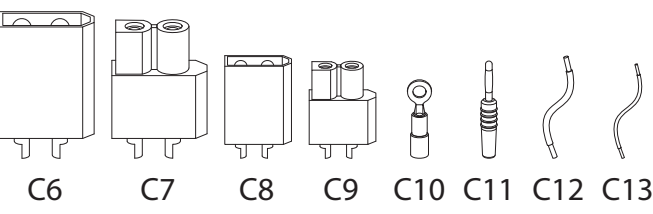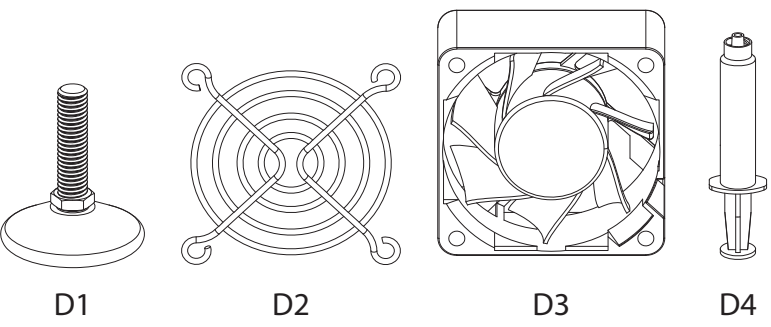

| #  | Description                                               |     |
|----|-----------------------------------------------------------|-----|
| D1 | Feet M8                                                   | x4  |
| D2 | SEPA FG60 Fan Finger Guard 60x60 mm                       | x12 |
| D3 | Sunon 171056 Axiaalfan12 V/DC (l x b x h) 60 x 60 x 25 mm | x12 |
| D4 | Gelid GC-Pro Thermal Paste 7 W/mK 7 g                     | x4  |

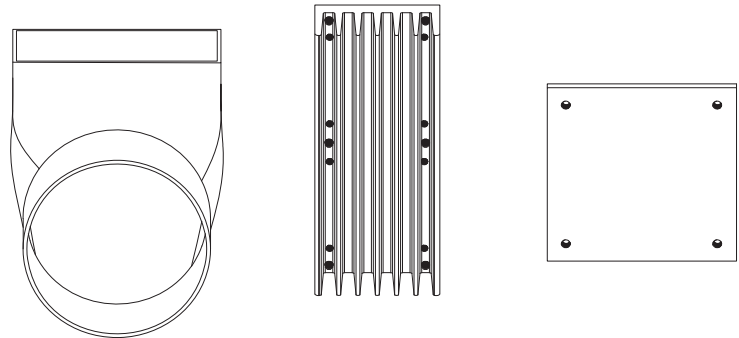

| #  | Description                                                                                                         |    |
|----|---------------------------------------------------------------------------------------------------------------------|----|
| E1 | ROTHEIGNER Diverter 90° Round Square Flat 111 x 54 mm, Ø 100 mm,<br>ROTHEIGNER Hoseconnector plastic white Ø 100 mm | x1 |
| E2 | Heatsink DEF76 - 150 mm<br><a href="https://www.deltourheatsinks.com/">https://www.deltourheatsinks.com/</a>        | x4 |
| E3 | Plexiglass tinted blue+ 100x100x8 mm                                                                                | x1 |

+) This is depending on the color of your LEDs, choice the opposite color for the Plexiglass. So for red LEDs take blue tinted Plexiglass for blue LEDs you take dark red/orange Plexiglass.

# More parts

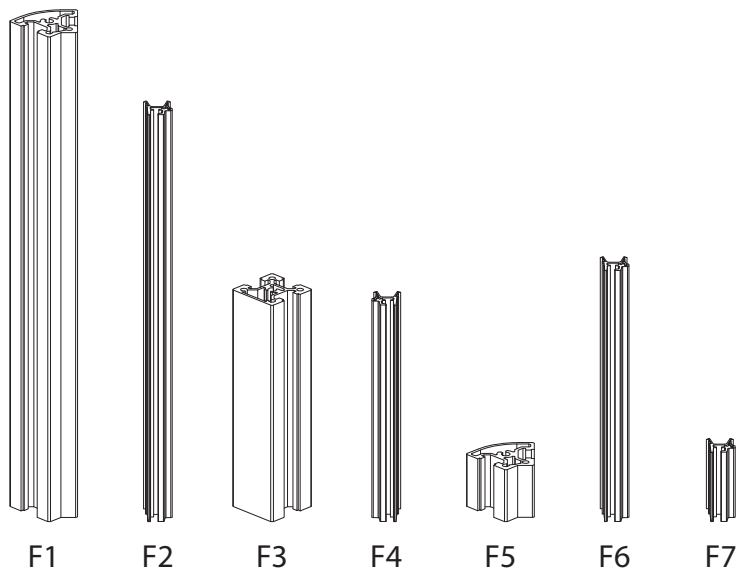

| #  | Description                                            |     |
|----|--------------------------------------------------------|-----|
| F1 | BLOCAN® Aluminium Profil W 30-45 - 4735001 - 280 mm    | x8  |
| F2 | BLOCAN® 2-piece framing profile 4mm - 4018556 - 235 mm | x14 |
| F3 | BLOCAN® Aluminium Profil F-G 30x30 - 4535001 - 125 mm  | x17 |
| F4 | BLOCAN® 2-piece framing profile 4mm - 4018556 - 125 mm | x18 |
| F5 | BLOCAN® Aluminium Profil W 30-45 - 4735001 - 30 mm     | x8  |
| F6 | BLOCAN® 2-piece framing profile 4mm - 4018556 - 145 mm | x2  |
| F7 | BLOCAN® 2-piece framing profile 4mm - 4018556 - 40 mm  | x2  |

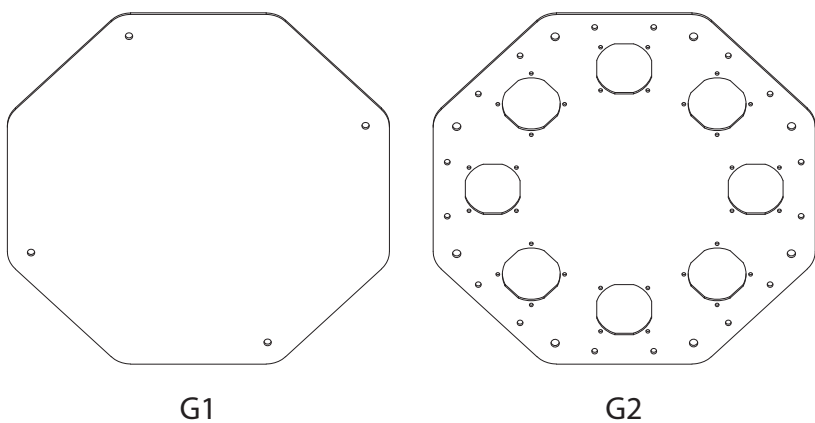

| #   | Description                           |    |
|-----|---------------------------------------|----|
| G   | Aluminium 1050a 4mm thick             |    |
| G1  | Top plate 404x404x4mm                 | x1 |
| G2  | Bottom plate 404x404x4mm              | x1 |
| G3  | LED plate 240x114x4mm                 | x4 |
| G4  | Blank plate 240x114x4mm               | x2 |
| G5  | Viewport plate 240x114x4mm            | x1 |
| G6  | Air plate 146x114x4mm                 | x1 |
| G7  | Fan cover plate 63x63x4mm             | x4 |
| G8  | Utility plate 50x114x4mm              | x1 |
| G9  | LED plate drill template 150x66x4mm   | x1 |
| G10 | Plexiglass drill template 100x100x4mm | x1 |

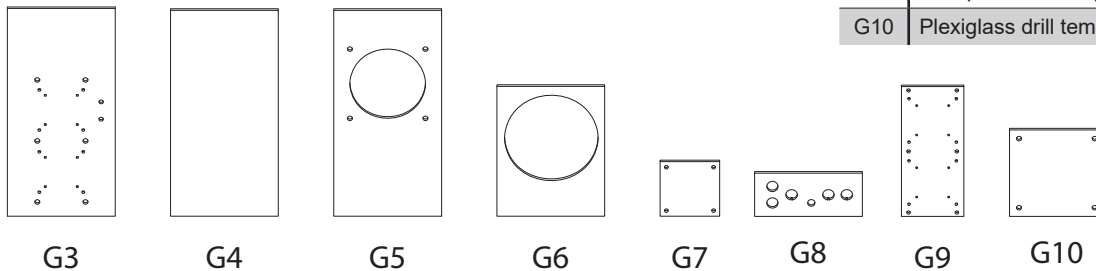

# Equipment

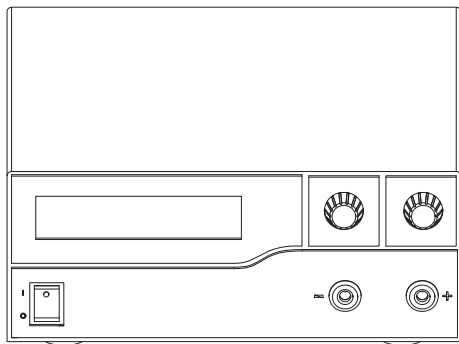

H1

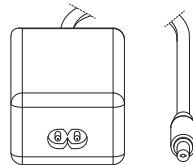

H2

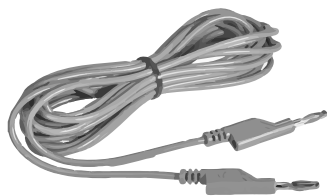

H3

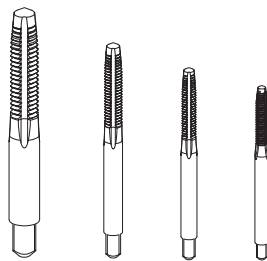

H4

| #  | Description                                                   |    |
|----|---------------------------------------------------------------|----|
| H1 | VOLTCRAFT DPPS-32-30 Bench PSU<br>1 - 32 V DC 0 - 30 A 960 W  | x1 |
| H2 | Dehner Elektronik ATS 036T-A120 power-supply<br>12V/DC 3A 36W | x1 |
| H3 | Safety laboratory cables, Red and Black                       |    |
| H4 | Thread Taps, 8mm, 5mm, 4mm, 3mm                               |    |



# Viewport plate assembly

To assemble the view-port plate first we need to drill and tap the Plexiglass plate by using the template (G10), if you already performed this then excellent! Go to step 8, if not start at step 1.

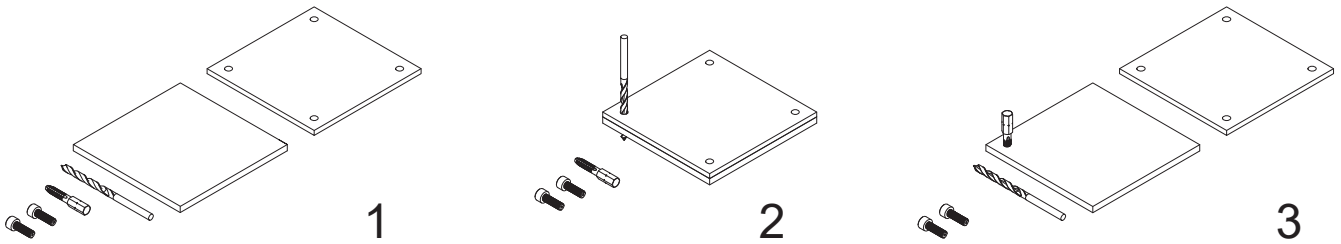

1. Tools required for this operation are a M5 thread tap, a 4.5 mm drill, and 2 M5x10mm hex screws.
2. Add the template (G10) on top of the Plexiglass square and drill the first hole through the plastic.
3. Remove the template and thread the hole with the M5 thread tap.

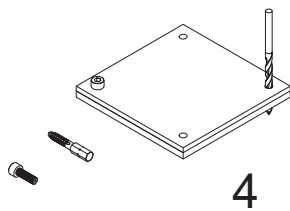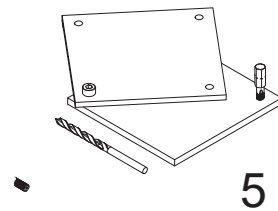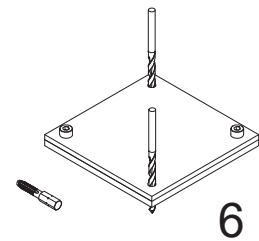

4. Add the template back on the plexiglass and secure the plate by the use of a M5 hex screw, drill now the second hole on the opposite side of the first hole.
5. Slide the template to the side but keep the screw in place. Thread the second hole with M5 thread tap.
6. Add the template back and secure the plate by adding the second screw, This will prevent the template from shifting. Drill now the two remaining holes.

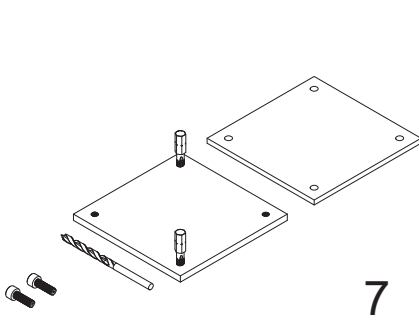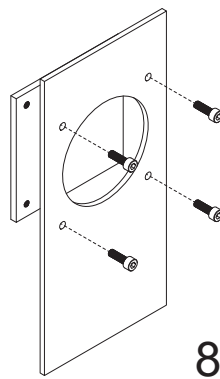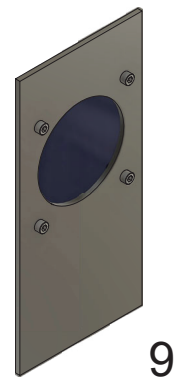

7. Remove the template and thread tap the remaining holes.
8. Attach the Plexiglass to the view-port plate by using 4x M5x10mm hex screws.
9. Finished product.

# LED plate assembly

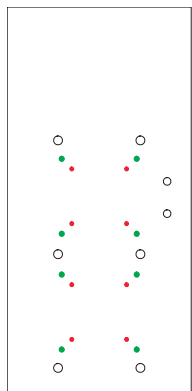

1

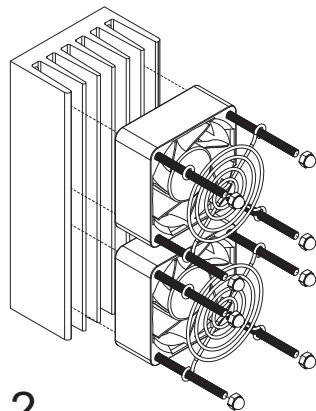

2

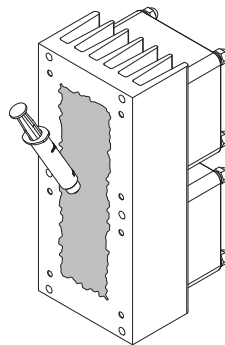

3

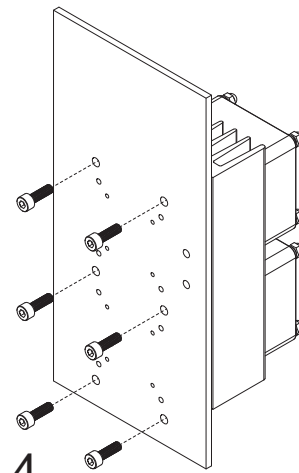

4

1. Thread the red highlighted holes of the led plate (G3) with a M3 thread tap and the green highlighted holes with a M4 thread tap.
2. Attach the fan finger guard and the fans on the heat sink by screwing in the M4x70mm rods with M4 acorn nuts as the cap. Make sure the fan's arrow is pointed towards the heat sink.
3. Apply thermal paste on the heat sink side, the amount should be enough to cover the area where the poweredleds are going to be placed.
4. Attach the led plate (G3) to the heat sink assembly with the M5x12mm hex screws.

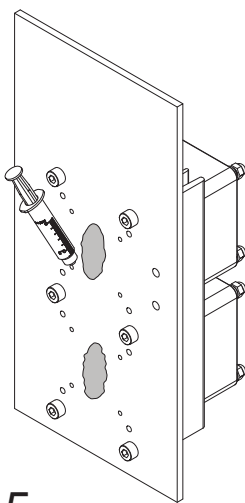

5

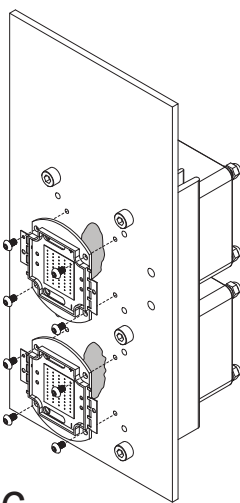

6

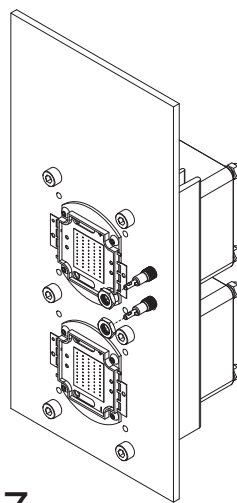

7

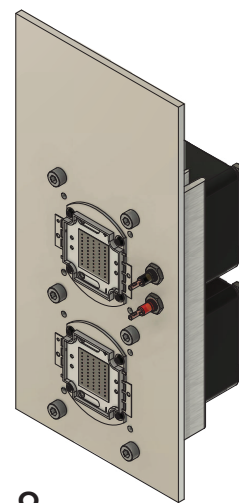

8

5. Apply also here thermal paste, enough to cover the surface of the poweredled.
6. Attach the powerleds on the led plate with the M3x5mm hex screw. Excess thermal paste squeezed out under the powerled can be cleaned with isopropanol.
7. Insert and attach the two jacket busses (2 mm diameter, C4).
8. Final assembly, continue to LED plate wiring assembly.

# LED plate wiring assembly

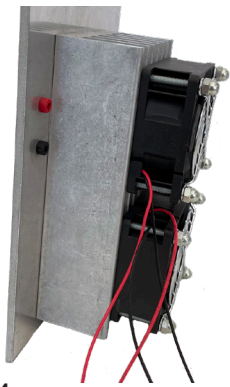

1

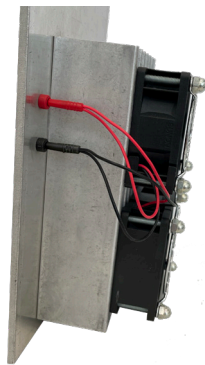

2

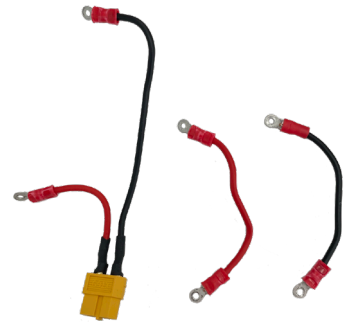

3

1. Wires of the fans should stick to the side of the LED plate with the connectors.
2. Combine the red and the black wires and solder them to the red and black 2mm banana plugs (C11).
3. Use a XT60 plug and attach a red and black 16 AWG wire. Cut on length and crimp the ring terminals on the end wires. Make also a red and black wire with on both ends crimped ring terminals

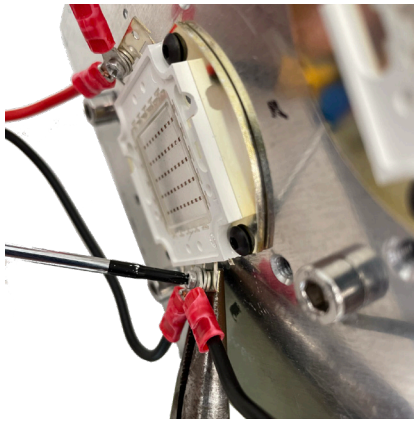

4

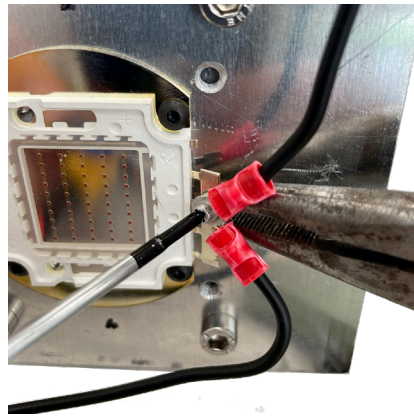

5

- 4 and 5. Connect the red and black wires together with the powered by using a 2Mx4mm screw and nut. Alternatively you can solder directly the wires to the powered.

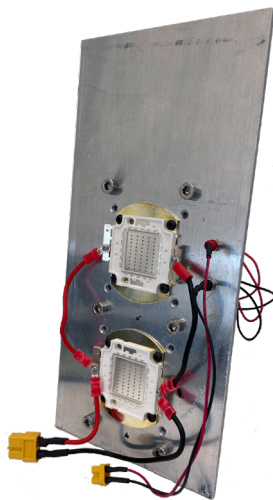

6

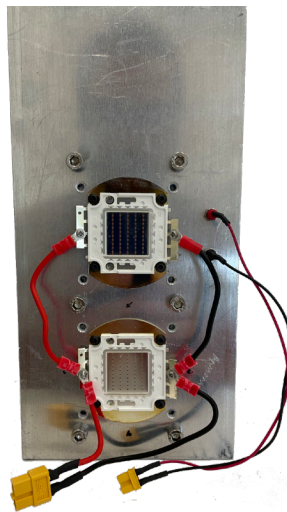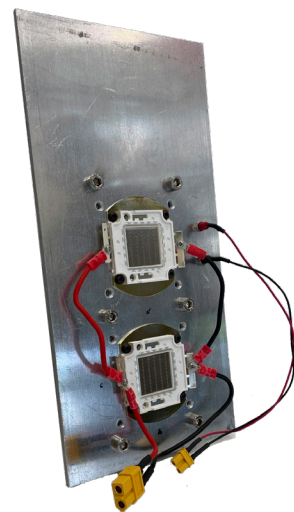

6. Solder 22 AWG red and black wire and connect this to a XT30 plug. Connect the red and black wire to the 2mm banana plug bus (C4). LED plate is completed.

Due to the modularity of the design other colored LED plates can also of course be made. The example we are showing here is the creation of red light LED plates. Blue light LED plates have also been made in the exactly the same way.

# Utility plate assembly

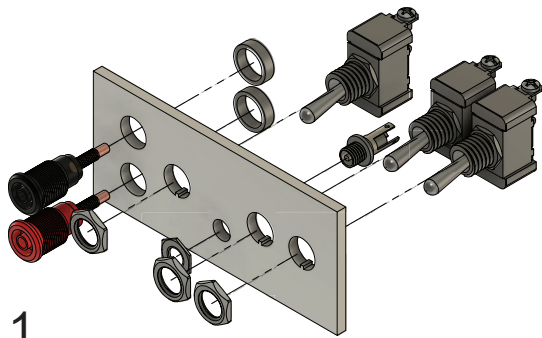

1

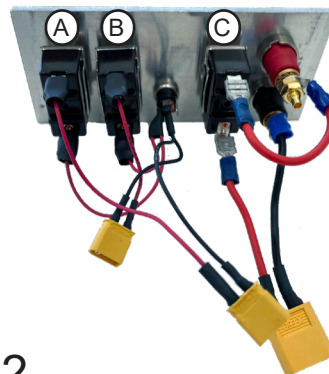

2

1. Assemble the utility plate with the banana plugs, DC bus and the switches.
2. Add the wires in the order shown here for a parallel connection of the switches and the power. See the diagram below for the connection wiring. For both A and B a XT30 bus is needed and 22 AWG wire, for C a XT60 bus and 16 AWG wire.

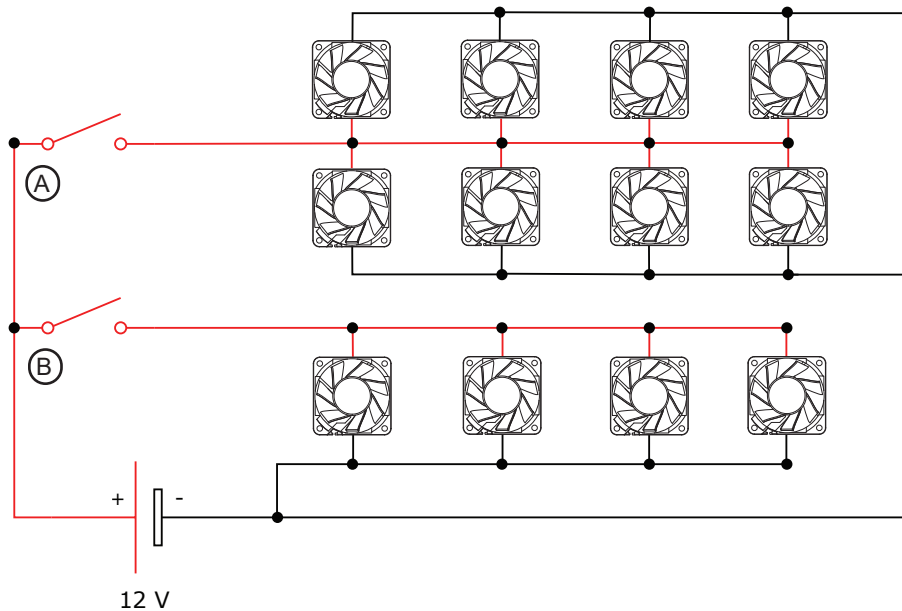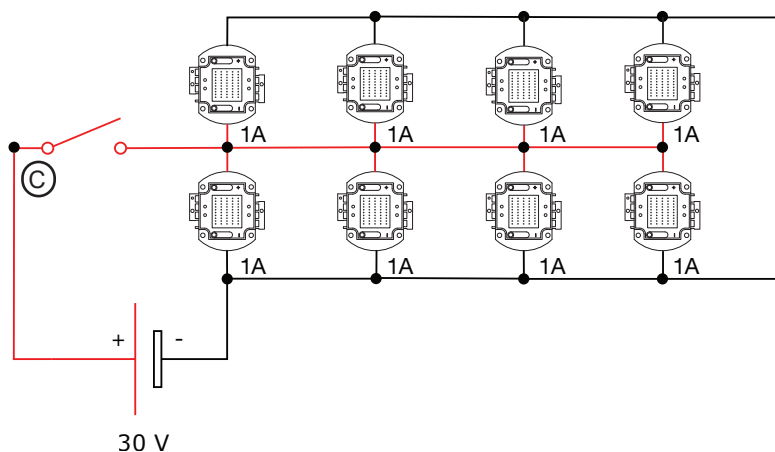

# Main body assembly

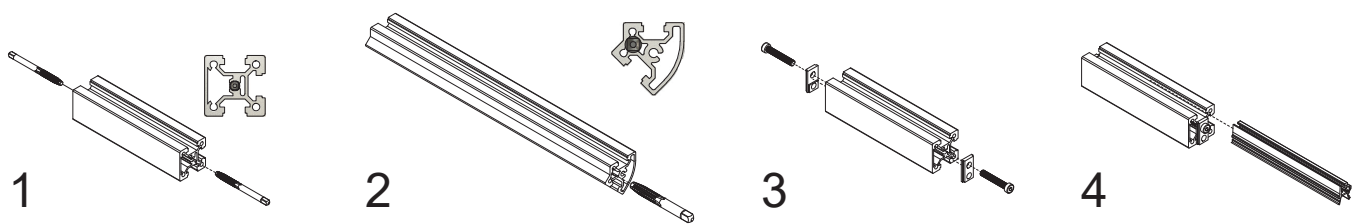

1. Tap M5 thread in aluminum frame F3.
2. Tap M8 thread in aluminum frame F1.
3. Screw in plate from bracket short (B6) on both side of F3.
4. Push in framing profile F4 in aluminum frame F3.

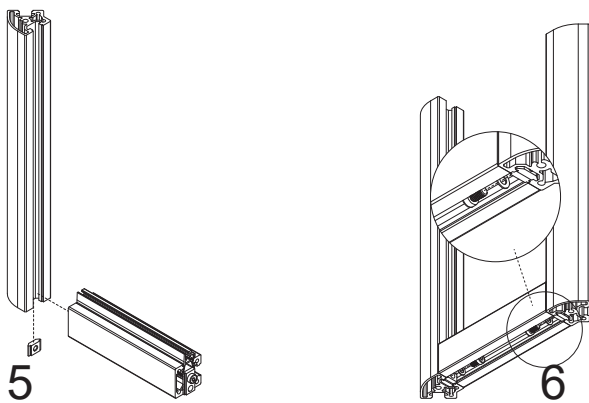

5. Slide T-slot from B6 into aluminum frame F1
6. Attach F3 to F1 with ring and hex socket screw from B6, repeat on other side of F3
7. Repeat step 3 till 6 for fully assembled frame

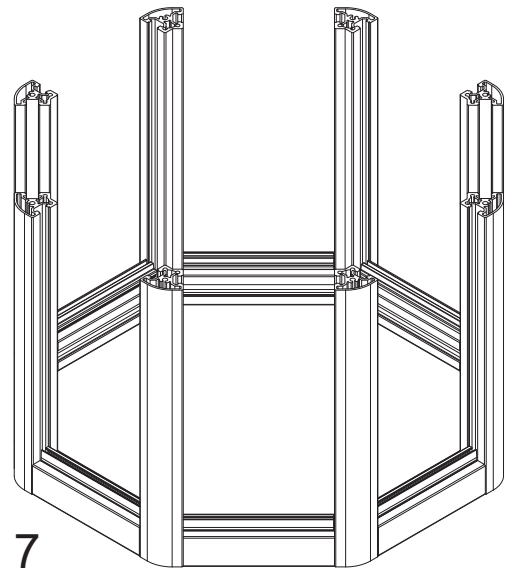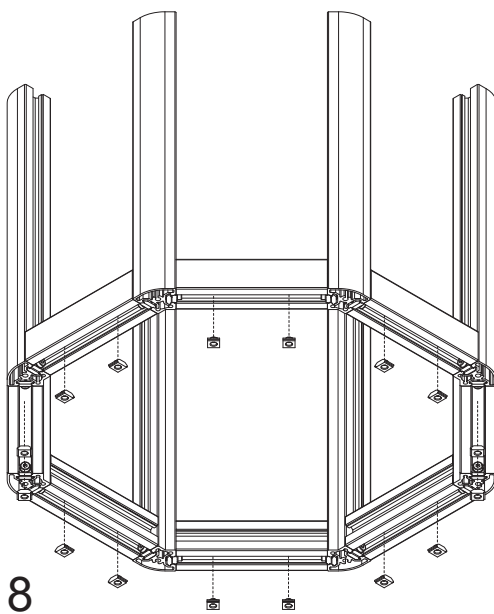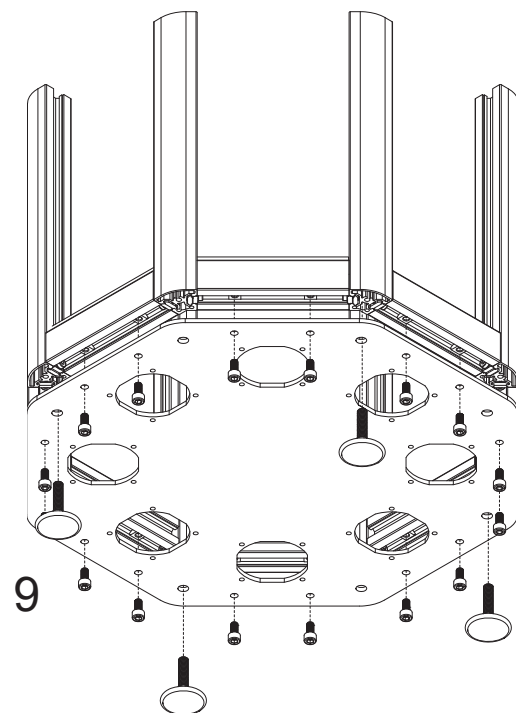

8. Insert T-slot M6 (B3) by pushing them in the frame, make use of paper or cardboard template to place them correctly for the next step.
9. Add aluminum bottom plate (G2) and attach it to the frame with M6x12 mm hex screw (A4) and screw in the feet (D1).



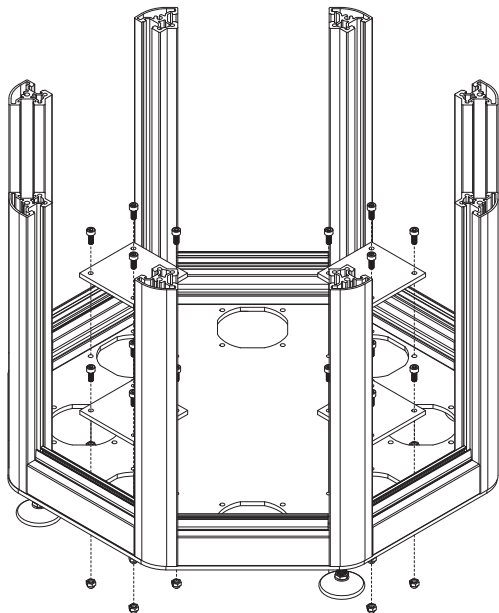

10

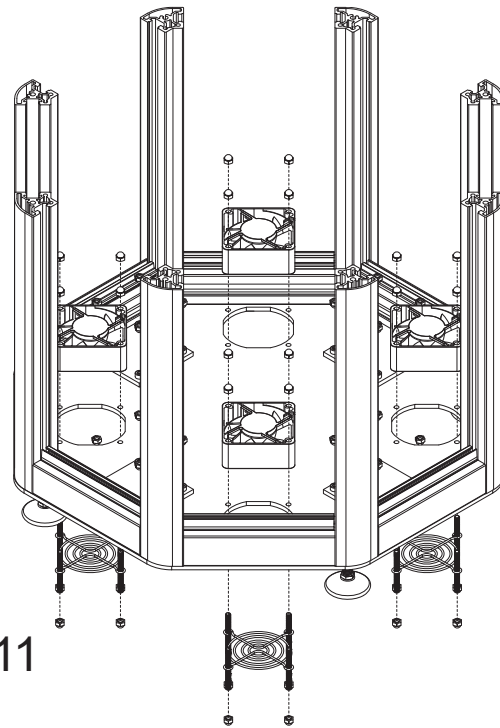

11

10. Close of any unused fan holes with the fan cover plates (G7) by using M4x10 mm hex screw and the M4 acorn nut (A7 en B1 respectively)
11. Add the fans, with the arrow pointing into the reactor, on top and the fan finger guard on the bottom of the bottom plate by inserting the M4 x 50 mm rods and capping both sides with an M4 acorn nut.

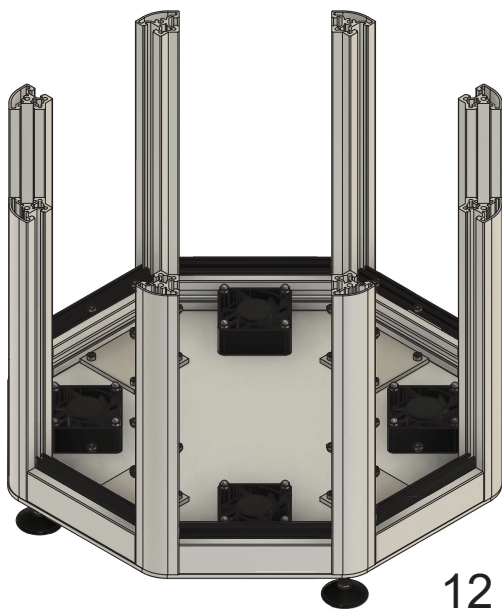

12

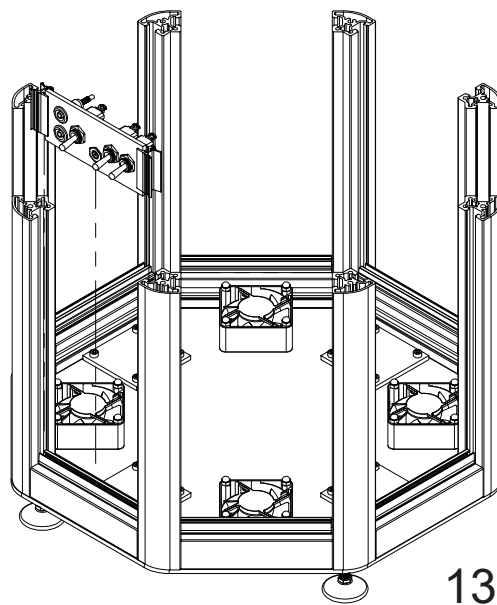

13

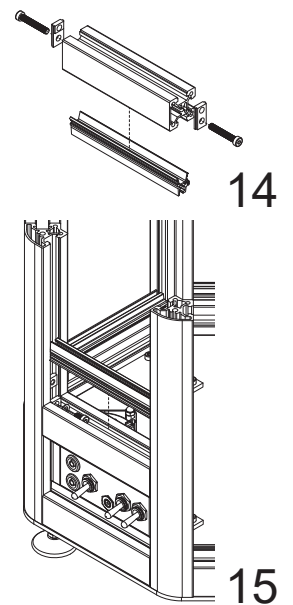

14

15

12. Render of the assembly of the bottom frame.
13. Add assembled utility plate to the frame with the side profiles (F7)
14. Assemble the utility top frame
15. Add utility top frame in the main frame

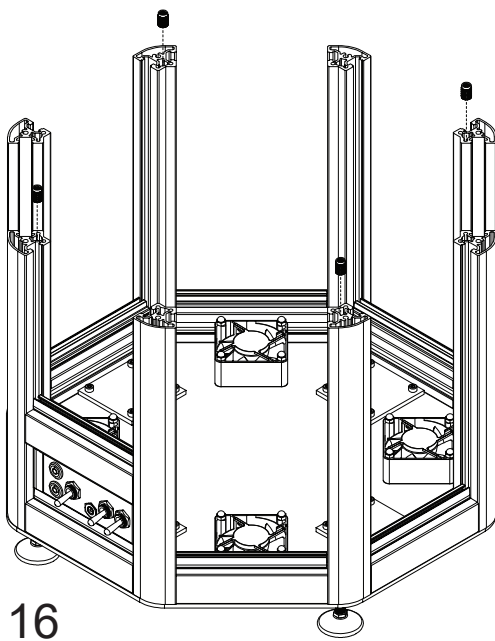

16

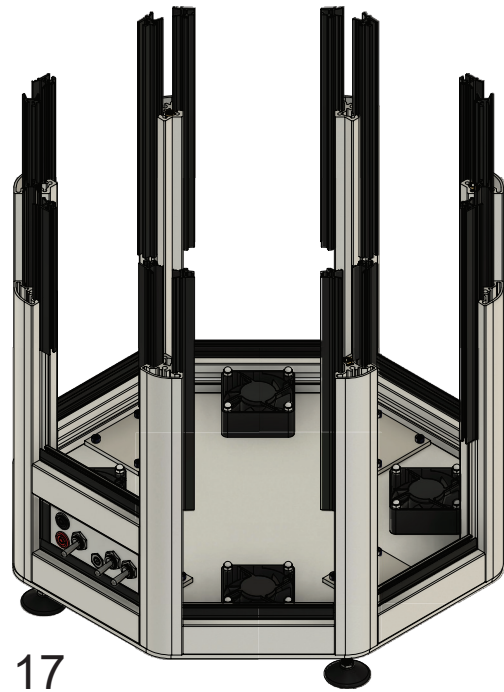

17

16. Hammer in brass screw on top of the side frames.

17. Add the remaining profiles

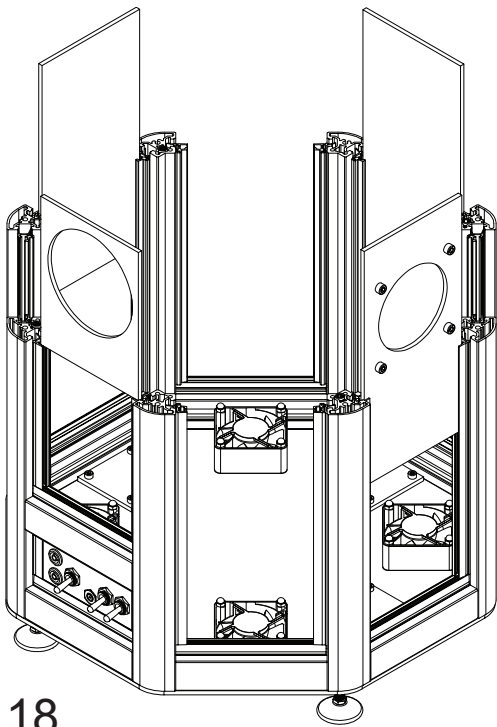

18

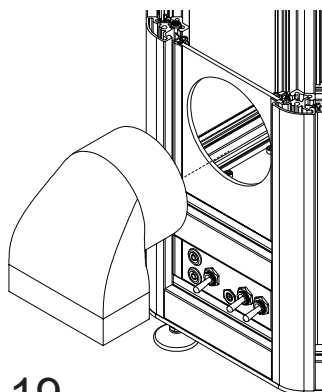

19

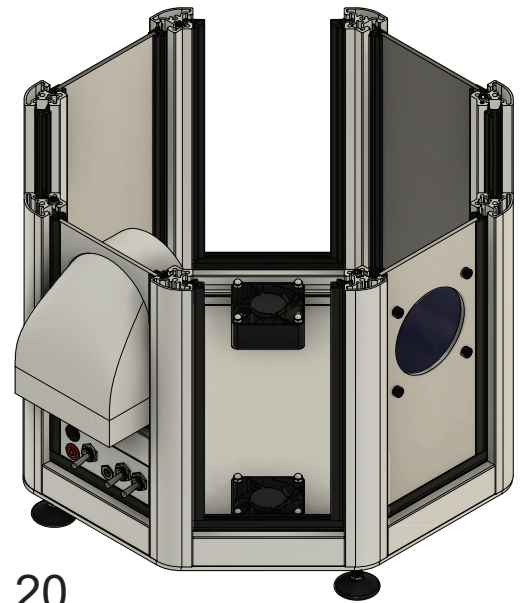

20

18. Insert the cooling plate (G6), the 2 blank plates (G4), and the view port assembly.

19. Add E1 in the cooling plate.

20. Render of half way complete assembly, continue to wiring.

# Wiring assembly

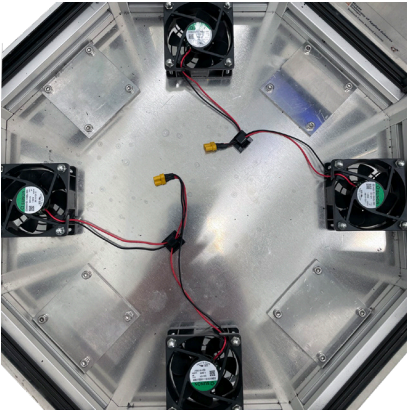

1

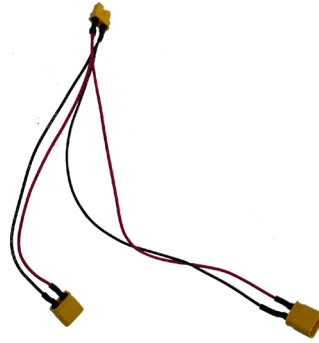

2

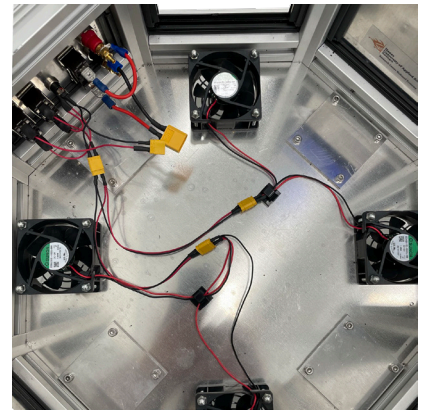

3

1. Connect the bottom plate ventilators in pairs, and add an XT30 plug on each end.
2. Make a parallel connector with 2 XT30 buses connected to 1 XT 30 plug with 22 AWG wire.
3. Connect the bottom plate ventilators to the utility plate. Test the setup.

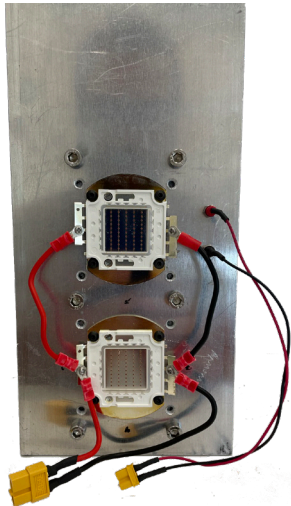

4

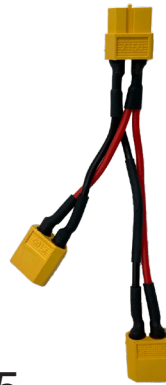

5

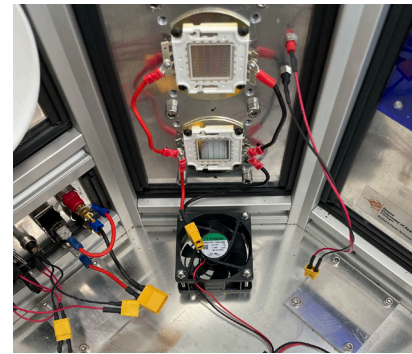

6

4. Take a fully assembled LED plate.
5. Make a parallel connector with 2 XT60 buses connected to 1 XT 60 plug with 16 AWG wire and a parallel wire like in step 2.
6. Slide in the fully assembled LED plate.

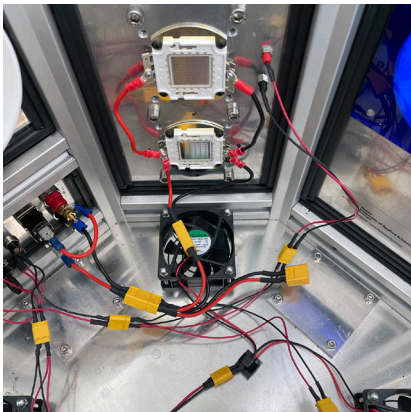

7

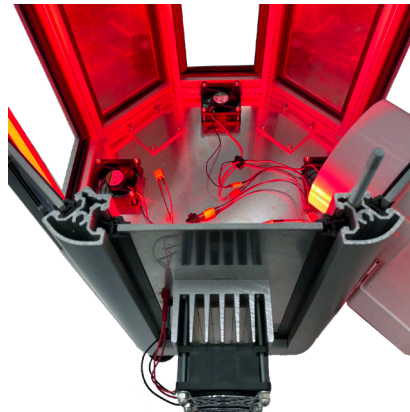

8

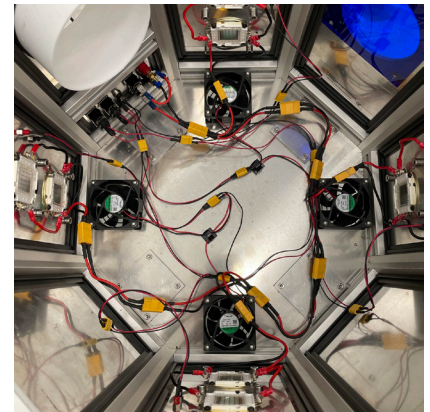

9

7. Connect the LED power connector and the ventilator connector to the utility plate.
8. Test the setup, make sure that the ventilators of the LED plate are working. **DO NOT LOOK IN THE LIGHT, and wear protective colored glasses.**
9. Repeat process till everything is connected.



# Lid and final assembly

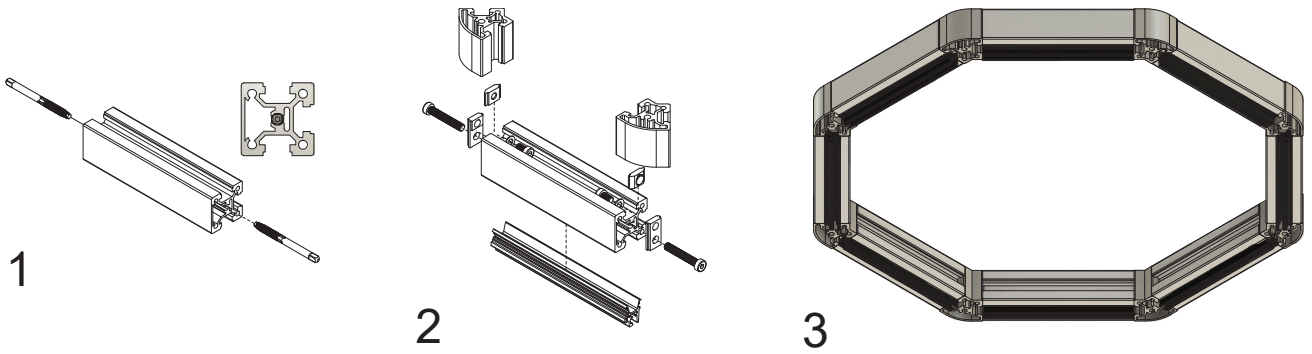

1. Tap M5 thread in aluminum frame F3.
2. Add framing profile F4 and screw in plate (B6) on both side of F3, and attach F5 with the T-slot and hex screws, continue till it looks like picture 3.

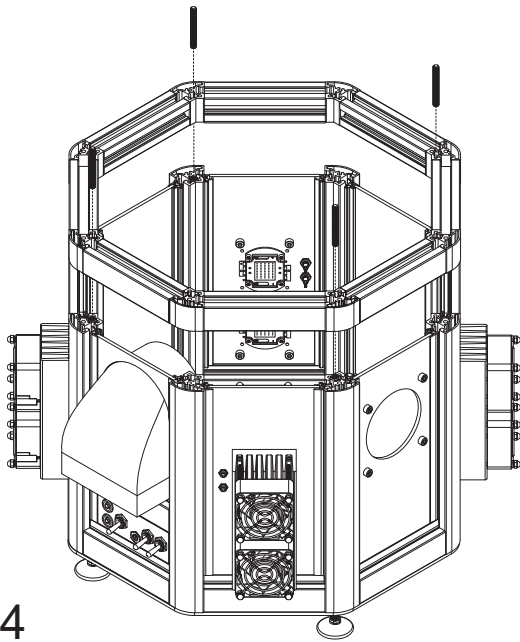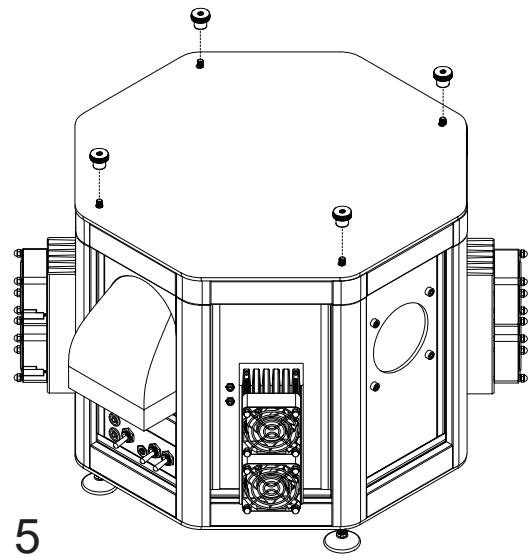

1. Add M6 rods (A1) in the brass screws and overlay the assembled ring (3).
2. Add top plate (G1) and screw in the knobs (B5).

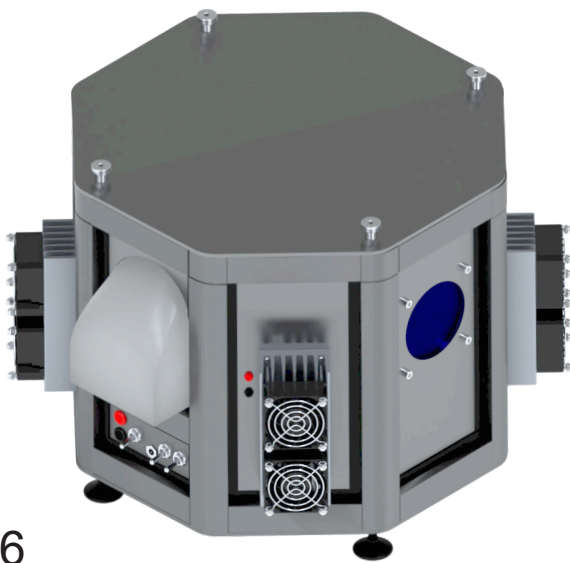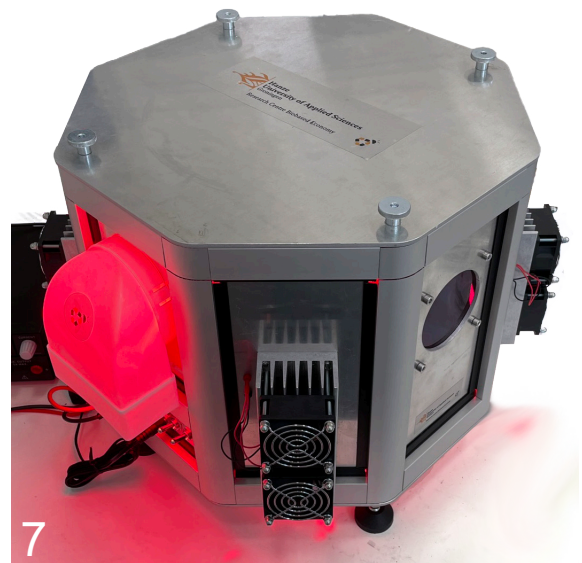

6. Render of final assembly
7. Picture of final assembly the octoColor with red lights working.

# OctoColor Cutouts DXF content

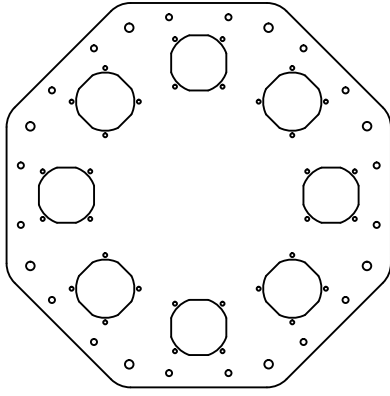

Bottom plate

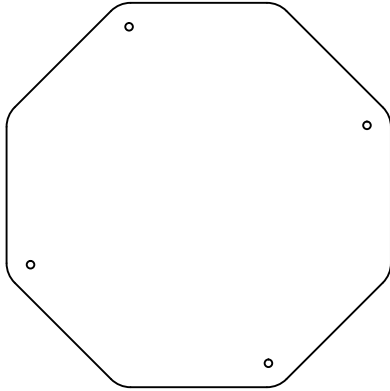

Top plate

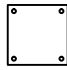

Fan plate

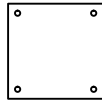

Plexiglass drill template

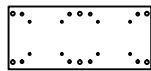

Led plate drill template

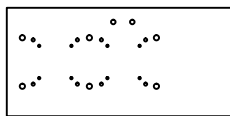

Air plate

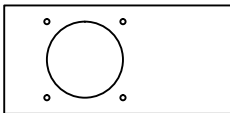

Utility plate

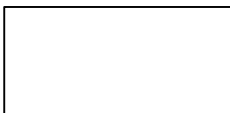

Blank plate

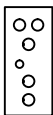

View plate

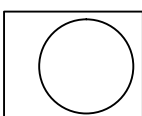

LED plate

# Heat sink deltour DEF76 DXF content

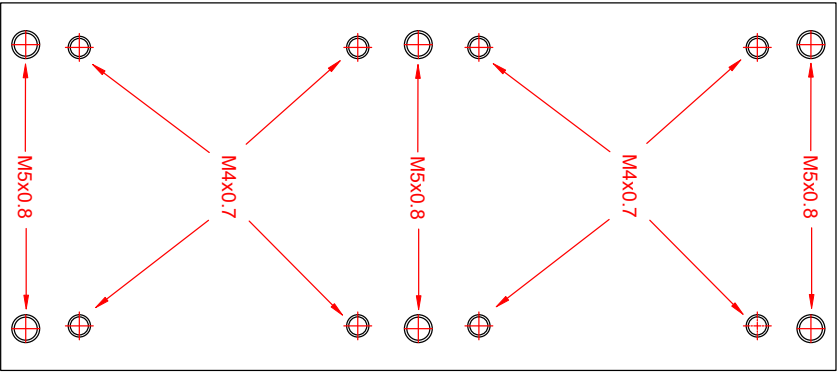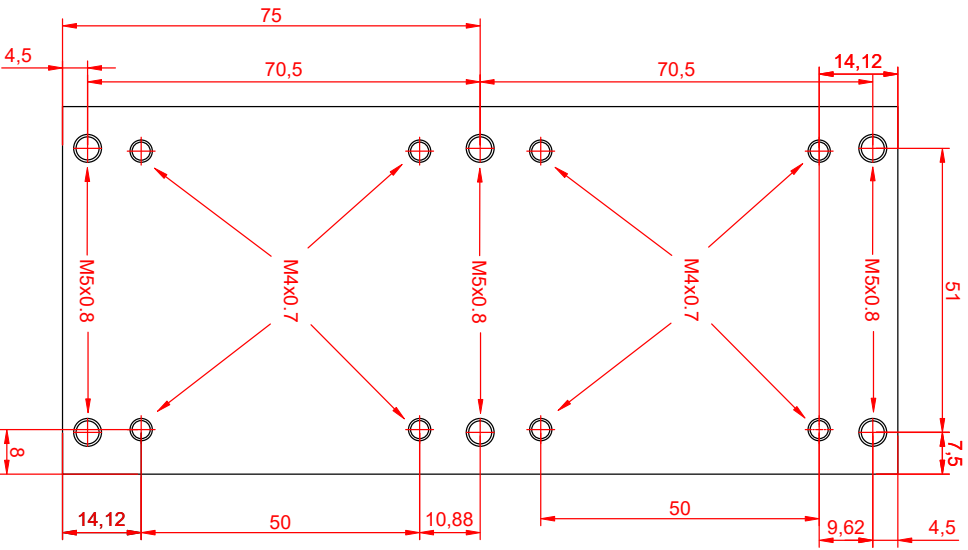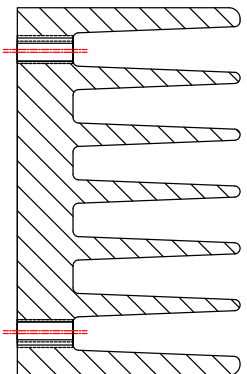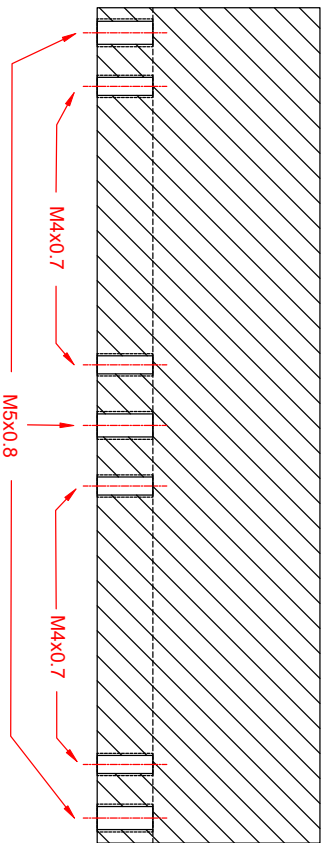

Supplement: d2re00310d1.pdf [file d2re00310d1.pdf]
